# Supplementary material for: Comparing the differences of prokaryotic microbial community between pit walls and bottom from Chinese liquor revealed by 16S rRNA gene sequencing
Source: Open Life Sci. 2023 Feb 23;18(1):20220571. doi: 10.1515/biol-2022-0571 (PMC9962418; doi:10.1515/biol-2022-0571)
Supplement: Supplementary Table [file biol-2022-0571-sm.xlsx]

## Sheet: YJ-S versus YJ-Z
Genus level difference of microorganism population between YJ-S and YJ-Z
Genus	Freq1	Freq2	pValue	qValue	Effect Size	95.0% lower CI	95.0% upper CI	YJ-S	YJ-Z
Petrimonas	4.29464	0.259719	0	0	4.03492	3.86435	4.20549	2503	129
Acinetobacter	43.5263	0.140933	0	0	43.3854	42.9815	43.7892	25368	70
Aminobacterium	1.03462	25.0357	0	0	-24.0011	-24.3909	-23.6114	603	12435
Clostridium IV	1.79301	21.3936	0	0	-19.6006	-19.977	-19.2242	1045	10626
Caloramator	0.0772108	17.0126	0	0	-16.9354	-17.2666	-16.6042	45	8450
Lysinibacillus	14.9635	0.0261733	0	0	14.9373	14.6473	15.2272	8721	13
Lactobacillus	0.0274527	2.48646	0	0	-2.45901	-2.59661	-2.32141	16	1235
Caryophanon	7.05364	0.0201333	0	0	7.0335	6.82525	7.24175	4111	10
Proteiniphilum	4.1282	0.684532	2.8507587765e-321	1.92586788749e-319	3.44367	3.26663	3.62072	2406	340
Olsenella	0.0137264	1.91266	4.93e-306	3e-304	-1.89894	-2.01977	-1.7781	8	950
Solibacillus	1.49789	0.0100666	9.56e-225	5.28e-223	1.48782	1.38881	1.58683	873	5
unclassified	8.17748	12.7464	1.52e-133	7.7e-132	-4.5689	-4.93701	-4.20079	4766	6331
Rummeliibacillus	0.813287	0.00201333	1.4e-125	6.55e-124	0.811274	0.73825	0.884298	474	1
Bacillus	0.629697	0.00805331	1.9e-91	8.23e-90	0.621644	0.55694	0.686347	367	4
Tepidimicrobium	0.00857898	0.557692	1.82e-85	7.4e-84	-0.549113	-0.615035	-0.483191	5	277
Methanomassiliicoccus	0.0995161	0.797278	7.93e-76	3.01e-74	-0.697762	-0.780056	-0.615468	58	396
Garciella	0.346591	1.25028	1.28e-66	4.56e-65	-0.903686	-1.01243	-0.794941	202	621
Tissierella	0.559349	1.6006	2.69e-64	9.09e-63	-1.04125	-1.16713	-0.915361	326	795
Syntrophaceticus	0.276243	1.0872	2.04e-63	6.54e-62	-0.810954	-0.911616	-0.710292	161	540
Fonticella	0	0.356359	1.79e-60	5.44e-59	-0.356359	-0.408764	-0.303954	0	177
Methanobacterium	0.111527	0.664398	7.63e-54	2.21e-52	-0.552872	-0.629283	-0.47646	65	330
Tepidanaerobacter	0.0188738	0.398639	1.12e-52	3.1e-51	-0.379765	-0.436291	-0.323239	11	198
Pseudocitrobacter	0.28139	0	1.43e-44	3.78e-43	0.28139	0.238385	0.324396	164	0
Sedimentibacter	0.931677	1.92877	3.51e-44	8.89e-43	-0.997091	-1.14101	-0.853171	543	958
Syntrophomonas	0.62455	1.47577	3.96e-44	9.62e-43	-0.85122	-0.975059	-0.727381	364	733
Levilinea	0.252222	0.01208	1.25e-31	2.93e-30	0.240142	0.198289	0.281995	147	6
Soehngenia	0.32257	0.0563732	3.86e-25	8.68e-24	0.266196	0.215649	0.316743	188	28
Gelria	0.0326001	0.243613	2.36e-23	5.12e-22	-0.211013	-0.256777	-0.165249	19	121
Clostridium III	0.507876	0.16308	4.45e-23	9.33e-22	0.344796	0.277049	0.412543	296	81
Proteiniborus	0.0017158	0.134893	9.37e-22	1.9e-20	-0.133177	-0.16563	-0.100724	1	67
Kurthia	0.137264	0.00201333	1.58e-20	3.09e-19	0.13525	0.104934	0.165566	80	1
Lutispora	0.262517	0.612052	1.12e-18	2.12e-17	-0.349535	-0.429725	-0.269345	153	304
Haloplasma	0.0411791	0.209386	3.09e-16	5.69e-15	-0.168207	-0.21165	-0.124764	24	104
Arthrobacter	0.113243	0.00402666	1.35e-15	2.41e-14	0.109216	0.0813466	0.137085	66	2
Anaerocella	0.0188738	0.146973	1.12e-14	1.95e-13	-0.128099	-0.163587	-0.092611	11	73
Methanothrix	0.11839	0.01208	9.46e-13	1.6e-11	0.10631	0.0767664	0.135853	69	6
Intestinibacter	0.0772108	0.00201333	2.74e-11	4.5e-10	0.0751975	0.0523045	0.0980904	45	1
Sporosarcina	0.066916	0	3.94e-11	6.3e-10	0.066916	0.0459218	0.0879103	39	0
Flavonifractor	0.135548	0.0301999	1.09e-09	1.7e-08	0.105348	0.0717964	0.138899	79	15
Kozakia	0	0.0523465	1.71e-09	2.6e-08	-0.0523465	-0.0724623	-0.0322308	0	26
Atribacteria_genera_incertae_sedis	0.0017158	0.0523465	2.57e-08	3.81e-07	-0.0506307	-0.0710256	-0.0302359	1	26
Fructobacillus	0.133832	0.0362399	2.77e-08	4.01e-07	0.0975922	0.0635171	0.131667	78	18
Sporanaerobacter	0.120106	0.265759	3.74e-08	5.29e-07	-0.145654	-0.198951	-0.092356	70	132
Cloacibacillus	0.252222	0.110733	5.56e-08	7.69e-07	0.141489	0.0913519	0.191626	147	55
Clostridium XlVa	0.224769	0.0966398	1.62e-07	2.19e-06	0.128129	0.080961	0.175298	131	48
Trichococcus	0.0531897	0.00402666	6.74e-07	8.91e-06	0.049163	0.0296301	0.068696	31	2
Desulfitibacter	0.00686318	0.0563732	2.3e-06	2.97e-05	-0.04951	-0.0714414	-0.0275787	4	28
Candidatus Cloacamonas	0.0120106	0.0664398	3.31e-06	4.2e-05	-0.0544293	-0.078774	-0.0300845	7	33
Gracilibacter	0.0154422	0.0724798	3.71e-06	4.6e-05	-0.0570377	-0.0827656	-0.0313097	9	36
Pelospora	0.0463265	0.00402666	6.6e-06	8.03e-05	0.0422998	0.0239601	0.0606395	27	2
Faecalibacterium	0.0960846	0.201333	7.94e-06	9.46e-05	-0.105248	-0.15201	-0.0584861	56	100
Blautia	0.00514739	0.0422799	3.78e-05	0.000442126	-0.0371325	-0.0561268	-0.0181382	3	21
Alkanindiges	0.0360317	0.00201333	3.86e-05	0.000443099	0.0340184	0.0181132	0.0499236	21	1
Bacteroides	0.149274	0.0664398	4.58e-05	0.000515665	0.0828344	0.0441571	0.121512	87	33
Thauera	0.0652002	0.0161066	7.76e-05	0.000858134	0.0490936	0.0255561	0.0726311	38	8
Longilinea	0.00343159	0.0342266	0.000109735	0.00119141	-0.030795	-0.0477431	-0.0138469	2	17
Gaiella	0.0102948	0.0483199	0.000174329	0.00185951	-0.0380251	-0.0590341	-0.0170161	6	24
Pseudomonas	0.0823582	0.0281866	0.00017622	0.00184727	0.0541716	0.0265976	0.0817456	48	14
Pelotomaculum	0.144127	0.0684532	0.000191077	0.00196907	0.0756737	0.0372334	0.114114	84	34
Prevotella	0.0360317	0.00402666	0.000199118	0.00201772	0.0320051	0.0156177	0.0483924	21	2
Sporobacter	0.0102948	0.0463065	0.000303941	0.00302945	-0.0360118	-0.0566472	-0.0153763	6	23
Ethanoligenens	0.0223053	0	0.000372309	0.00365103	0.0223053	0.0101816	0.0344291	13	0
Christensenella	0.0583371	0.0161066	0.000489831	0.00472725	0.0422304	0.0196731	0.0647878	34	8
Psychrosinus	0.0634844	0.0201333	0.00061729	0.00586425	0.0433512	0.0193959	0.0673064	37	10
Carnobacterium	0.0205895	0	0.000702958	0.00657536	0.0205895	0.00894133	0.0322378	12	0
Lactivibrio	0.0102948	0.0442932	0.000870977	0.00802355	-0.0339984	-0.0542534	-0.0137435	6	22
Pseudoscardovia	0.0017158	0.0241599	0.00100369	0.00910812	-0.0224441	-0.0365196	-0.00836865	1	12
Methanocorpusculum	0.0188738	0	0.00133104	0.0119011	0.0188738	0.00772134	0.0300262	11	0
Roseburia	0.0600528	0.112746	0.00313738	0.0276454	-0.0526935	-0.0882827	-0.0171043	35	56
Parabacteroides	0.0308843	0.00603999	0.00352326	0.030602	0.0248443	0.00902626	0.0406624	18	3
Comamonas	0.0857898	0.0402666	0.00372335	0.0318845	0.0455232	0.0159214	0.0751251	50	20
Anaerovorax	0.0772108	0.134893	0.00423302	0.0357455	-0.0576822	-0.0970571	-0.0183072	45	67
Subdivision3_genera_incertae_sedis	0.0223053	0.0543599	0.00684923	0.0570457	-0.0320545	-0.0558701	-0.00823893	13	27
Rudaea	0.0703476	0.0322133	0.00739789	0.0607827	0.0381344	0.0114434	0.0648253	41	16
Dehalobacter	0.0017158	0.01812	0.00751612	0.0609307	-0.0164042	-0.0287097	-0.00409866	1	9
Clostridium sensu stricto	0.626265	0.759025	0.00868692	0.0694954	-0.132759	-0.232398	-0.033121	365	377
Metallibacterium	0.0137264	0	0.00922504	0.0728419	0.0137264	0.00421531	0.0232374	8	0
Aureitalea	0.0137264	0	0.00922504	0.071908	0.0137264	0.00421531	0.0232374	8	0
Caloribacterium	0	0.01208	0.00948597	0.0730059	-0.01208	-0.0217452	-0.00241474	0	6
Albidovulum	0	0.01208	0.00948597	0.0720934	-0.01208	-0.0217452	-0.00241474	0	6
Oxobacter	0.0531897	0.0221466	0.012354	0.0927314	0.0310431	0.00820358	0.0538825	31	11
Paracoccus	0.0120106	0	0.0177328	0.131482	0.0120106	0.00311371	0.0209074	7	0
Gp3	0.017158	0.0422799	0.0183455	0.134386	-0.0251219	-0.0460965	-0.00414741	10	21
Weissella	0.0789266	0.0422799	0.0192189	0.139108	0.0366467	0.00754917	0.0657442	46	21
Oscillibacter	0.0634844	0.0322133	0.0265133	0.189648	0.0312712	0.00544037	0.057102	37	16
Thermosyntropha	0.0017158	0.0140933	0.0280762	0.198492	-0.0123775	-0.0233453	-0.0014097	1	7
Advenella	0.0102948	0	0.0342485	0.236626	0.0102948	0.00205782	0.0185317	6	0
Achromobacter	0.0102948	0	0.0342485	0.239346	0.0102948	0.00205782	0.0185317	6	0
Burkholderia	0.144127	0.0986531	0.0365411	0.249629	0.0454737	0.0041115	0.086836	84	49
Treponema	0.0257369	0.00805331	0.0365963	0.247228	0.0176836	0.00245625	0.032911	15	4
Gluconacetobacter	0.0549055	0.0281866	0.0380188	0.254016	0.0267189	0.00264338	0.0507943	32	14
Macellibacteroides	0.0223053	0.00603999	0.0416666	0.275362	0.0162654	0.00234787	0.0301828	13	3
Oligosphaera	0	0.00805331	0.0448133	0.289856	-0.00805331	-0.0159451	-0.000161529	0	4
Peptococcus	0	0.00805331	0.0448133	0.286805	-0.00805331	-0.0159451	-0.000161529	0	4
Litorilinea	0	0.00805331	0.0448133	0.283817	-0.00805331	-0.0159451	-0.000161529	0	4
Holdemanella	0	0.00805331	0.0448133	0.292973	-0.00805331	-0.0159451	-0.000161529	0	4
Gemmiger	0.0188738	0.0402666	0.0467606	0.293097	-0.0213928	-0.0422657	-0.000519927	11	20

## Sheet: YJ-S versus YJ-X
Genus level difference of microorganism population between YJ-S and YJ-X
Genus	Freq1	Freq2	pValue	qValue	Effect Size	95.0% lower CI	95.0% upper CI	YJ-S	YJ-X
unclassified	8.17748	35.5407	0	0	-27.3632	-27.788	-26.9384	4766	23883
Blautia	0.00514739	2.05509	0	0	-2.04994	-2.15737	-1.94252	3	1381
Bacteroides	0.149274	4.16226	0	0	-4.01299	-4.16722	-3.85876	87	2797
Bifidobacterium	0.0223053	4.70692	0	0	-4.68461	-4.8452	-4.52402	13	3163
Clostridium sensu stricto	0.626265	3.8319	0	0	-3.20564	-3.36428	-3.04699	365	2575
Caryophanon	7.05364	0.0133931	0	0	7.04024	6.83218	7.2483	4111	9
Faecalibacterium	0.0960846	3.87952	0	0	-3.78344	-3.93159	-3.63528	56	2607
Lysinibacillus	14.9635	0.1503	0	0	14.8132	14.5221	15.1042	8721	101
Acinetobacter	43.5263	0.507448	0	0	43.0189	42.6128	43.4249	25368	341
Lactobacillus	0.0274527	6.49266	0	0	-6.4652	-6.65198	-6.27842	16	4363
Syntrophomonas	0.62455	3.40779	4.67e-289	2.58e-287	-2.78324	-2.93459	-2.63189	364	2290
Solibacillus	1.49789	0.00297623	5.89e-288	2.98e-286	1.49491	1.39621	1.59361	873	2
Alistipes	0.0240211	1.31698	4.05e-216	1.89e-214	-1.29296	-1.38007	-1.20586	14	885
Roseburia	0.0600528	1.13692	5.97e-159	2.59e-157	-1.07687	-1.15946	-0.99428	35	764
Gemmiger	0.0188738	0.955371	1.42e-155	5.74e-154	-0.936498	-1.01089	-0.862109	11	642
Rummeliibacillus	0.813287	0.00595247	8.81e-151	3.35e-149	0.807335	0.734185	0.880485	474	4
Caloramator	0.0772108	0.955371	2.73e-119	9.77e-118	-0.878161	-0.955088	-0.801234	45	642
Collinsella	0.00857898	0.65626	7.37e-111	2.49e-109	-0.647681	-0.709191	-0.586171	5	441
Burkholderia	0.144127	1.06698	3.98e-108	1.27e-106	-0.922853	-1.00642	-0.839289	84	717
Anaerostipes	0.0137264	0.629474	7.64e-102	2.32e-100	-0.615747	-0.676297	-0.555198	8	423
Barnesiella	0.0102948	0.491079	4.95e-80	1.43e-78	-0.480784	-0.534275	-0.427293	6	330
Ralstonia	0.0017158	0.419649	3.44e-75	9.52e-74	-0.417933	-0.466925	-0.368942	1	282
Lachnospiracea_incertae_sedis	0.0257369	0.5134	2.91e-73	7.7e-72	-0.487664	-0.543246	-0.432081	15	345
Fusicatenibacter	0.00686318	0.428578	1.01e-71	2.56e-70	-0.421715	-0.471562	-0.371868	4	288
Parabacteroides	0.0308843	0.470245	6.37e-63	1.55e-61	-0.439361	-0.493017	-0.385704	18	316
Ruminococcus2	0.0137264	0.372029	1.68e-56	3.93e-55	-0.358303	-0.405306	-0.3113	8	250
Pseudocitrobacter	0.28139	0	2.13e-55	4.79e-54	0.28139	0.238385	0.324396	164	0
Oscillibacter	0.0634844	0.514889	3.01e-55	6.54e-54	-0.451404	-0.509252	-0.393556	37	346
Clostridium XlVa	0.224769	0.846739	2.26e-53	4.74e-52	-0.62197	-0.701201	-0.542738	131	569
Intestinimonas	0.0549055	0.453876	3.47e-49	7.03e-48	-0.39897	-0.453234	-0.344707	32	305
Akkermansia	0.00857898	0.302088	5.74e-48	1.13e-46	-0.293509	-0.335678	-0.25134	5	203
Bacillus	0.629697	0.147324	1.96e-46	3.73e-45	0.482373	0.411909	0.552838	367	99
Petrimonas	4.29464	2.83486	2.19e-44	4.04e-43	1.45977	1.2528	1.66674	2503	1905
Megasphaera	0.0017158	0.247027	1.06e-43	1.9e-42	-0.245312	-0.282994	-0.207629	1	166
Clostridium XVIII	0.00514739	0.261909	2.28e-43	3.96e-42	-0.256761	-0.295841	-0.217682	3	176
Streptococcus	0.00686318	0.257444	2.56e-41	4.32e-40	-0.250581	-0.28948	-0.211682	4	173
Levilinea	0.252222	0.0133931	5.02e-38	8.25e-37	0.238829	0.197178	0.28048	147	9
Eubacterium	0.0017158	0.211313	2.49e-37	3.99e-36	-0.209597	-0.244479	-0.174715	1	142
Chitinophaga	0	0.191967	1.18e-35	1.84e-34	-0.191967	-0.225062	-0.158872	0	129
Dorea	0.017158	0.260421	2.96e-35	4.5e-34	-0.243263	-0.283236	-0.203289	10	175
Soehngenia	0.32257	0.050596	2.62e-32	3.88e-31	0.271974	0.222899	0.321048	188	34
Ruminococcus	0.0274527	0.267861	1.26e-31	1.83e-30	-0.240408	-0.281737	-0.19908	16	180
Aminobacterium	1.03462	1.74705	5.18e-27	7.32e-26	-0.712425	-0.841116	-0.583734	603	1174
Eisenbergiella	0.00514739	0.169645	5.45e-27	7.53e-26	-0.164498	-0.196153	-0.132843	3	114
Sporobacter	0.0102948	0.187503	6.62e-27	8.94e-26	-0.177208	-0.210938	-0.143478	6	126
Cloacibacillus	0.252222	0.0386911	7.66e-26	1.01e-24	0.213531	0.17018	0.256882	147	26
Clostridium IV	1.79301	2.63099	7.9e-24	1.02e-22	-0.837985	-1.00001	-0.675965	1045	1768
Sporanaerobacter	0.120106	0.398815	7.39e-23	9.36e-22	-0.27871	-0.33404	-0.22338	70	268
Odoribacter	0	0.108633	1.73e-20	2.15e-19	-0.108633	-0.133539	-0.0837262	0	73
Tepidimicrobium	0.00857898	0.135419	3.4e-19	4.13e-18	-0.12684	-0.155643	-0.0980366	5	91
Candidatus Cloacamonas	0.0120106	0.144347	7.57e-19	9.02e-18	-0.132337	-0.162389	-0.102285	7	97
Parasutterella	0.0257369	0.178574	1.3e-18	1.52e-17	-0.152837	-0.187313	-0.118361	15	120
Enterococcus	0.0017158	0.105656	1.95e-18	2.24e-17	-0.103941	-0.128733	-0.0791482	1	71
Paraprevotella	0.00343159	0.113097	2.07e-18	2.33e-17	-0.109665	-0.135519	-0.0838117	2	76
Undibacterium	0	0.0863108	2.92e-16	3.23e-15	-0.0863108	-0.108514	-0.0641078	0	58
Escherichia/Shigella	0.199032	0.0446435	4.59e-16	4.99e-15	0.154389	0.114837	0.19394	116	30
Methanothrix	0.11839	0.0119049	2.67e-15	2.85e-14	0.106485	0.077374	0.135596	69	8
Phenylobacterium	0	0.075894	1.52e-14	1.59e-13	-0.075894	-0.0967152	-0.0550728	0	51
Phascolarctobacterium	0.0154422	0.122026	9.57e-14	9.86e-13	-0.106583	-0.134841	-0.0783261	9	82
Kurthia	0.137264	0.0238099	1.09e-13	1.11e-12	0.113454	0.0812115	0.145696	80	16
Eggerthella	0	0.0699415	1.9e-13	1.89e-12	-0.0699415	-0.0899301	-0.0499529	0	47
Listeria	0	0.0699415	1.9e-13	1.86e-12	-0.0699415	-0.0899301	-0.0499529	0	47
Thauera	0.0652002	0	2.2e-13	2.12e-12	0.0652002	0.0444767	0.0859238	38	0
Anaerovorax	0.0772108	0.239587	3.2e-13	3.04e-12	-0.162376	-0.205676	-0.119077	45	161
Rudaea	0.0703476	0.00148812	5.05e-13	4.72e-12	0.0688595	0.0471373	0.0905817	41	1
Fructobacillus	0.133832	0.025298	1.12e-12	1.03e-11	0.108534	0.0765105	0.140558	78	17
Methanobacterium	0.111527	0.0163693	1.79e-12	1.62e-11	0.0951574	0.0663854	0.123929	65	11
Methanobrevibacter	0.101232	0.0133931	6.54e-12	5.84e-11	0.0878389	0.0605788	0.115099	59	9
Simplicispira	0.0960846	0.0119049	9.21e-12	8.11e-11	0.0841796	0.057708	0.110651	56	8
Alkalibaculum	0.0308843	0.141371	9.26e-12	8.04e-11	-0.110487	-0.142275	-0.0786983	18	95
Sporosarcina	0.066916	0.00446435	3.43e-10	2.94e-09	0.0624517	0.0408582	0.0840452	39	3
Dialister	0.164716	0.0520841	5.94e-10	5.02e-09	0.112632	0.0754641	0.1498	96	35
Clostridium III	0.507876	0.784238	1.16e-09	9.64e-09	-0.276362	-0.364558	-0.188167	296	527
Brevundimonas	0.00343159	0.0610128	2.69e-09	2.21e-08	-0.0575812	-0.0768474	-0.038315	2	41
Tepidanaerobacter	0.0188738	0.0967276	5.02e-09	4.07e-08	-0.0778539	-0.103869	-0.0518387	11	65
Hydrogenispora	0	0.0461316	5.63e-09	4.45e-08	-0.0461316	-0.0623671	-0.0298961	0	31
Bosea	0	0.0461316	5.63e-09	4.51e-08	-0.0461316	-0.0623671	-0.0298961	0	31
Staphylococcus	0	0.0431554	2.11e-08	1.65e-07	-0.0431554	-0.0588587	-0.0274521	0	29
Bradyrhizobium	0.0120106	0.075894	3.67e-08	2.83e-07	-0.0638834	-0.0865258	-0.0412411	7	51
Nitrosomonas	0.0377475	0	4.7e-08	3.57e-07	0.0377475	0.0219771	0.0535179	22	0
Methanomassiliicoccus	0.0995161	0.223218	5.98e-08	4.49e-07	-0.123701	-0.167616	-0.0797872	58	150
Aeromonas	0.0600528	0.00744059	8.09e-08	6e-07	0.0526123	0.0316811	0.0735434	35	5
Proteiniphilum	4.1282	3.54618	8.81e-08	6.45e-07	0.582021	0.368387	0.795654	2406	2383
Weissella	0.0789266	0.0163693	1.54e-07	1.11e-06	0.0625573	0.037791	0.0873236	46	11
Natranaerovirga	0.0772108	0.0163693	2.64e-07	1.89e-06	0.0608415	0.0363043	0.0853788	45	11
Lutispora	0.262517	0.42709	7.41e-07	5.24e-06	-0.164573	-0.229046	-0.1001	153	287
Prevotella	0.0360317	0.111609	9.1e-07	6.36e-06	-0.0755771	-0.105153	-0.0460016	21	75
Ferruginibacter	0.0308843	0	1.01e-06	6.98e-06	0.0308843	0.016619	0.0451497	18	0
Alkanindiges	0.0360317	0.00148812	2.32e-06	1.58e-05	0.0345436	0.018862	0.0502252	21	1
Gracilibacter	0.0154422	0.0699415	2.6e-06	1.76e-05	-0.0544994	-0.0768893	-0.0321094	9	47
Aquamicrobium	0.0428949	0.00446435	3.26e-06	2.18e-05	0.0384305	0.020877	0.055984	25	3
Comamonas	0.0857898	0.025298	3.5e-06	2.31e-05	0.0604918	0.0338544	0.0871292	50	17
Gp4	0.0274527	0	4.69e-06	3.06e-05	0.0274527	0.014003	0.0409025	16	0
Methanoculleus	0.468412	0.30804	5.26e-06	3.4e-05	0.160372	0.0908851	0.229859	273	207
Coprococcus	0.0102948	0.0565485	5.7e-06	3.65e-05	-0.0462537	-0.0660255	-0.0264818	6	38
Desulfotomaculum	0.0017158	0.0357148	5.77e-06	3.66e-05	-0.033999	-0.0486756	-0.0193225	1	24
Garciella	0.346591	0.212801	6.74e-06	4.22e-05	0.13379	0.0747102	0.19287	202	143
Holdemania	0	0.0282742	7.49e-06	4.6e-05	-0.0282742	-0.0409858	-0.0155626	0	19
Polynucleobacter	0	0.0282742	7.49e-06	4.65e-05	-0.0282742	-0.0409858	-0.0155626	0	19
Desulfitibacter	0.00686318	0.0476198	1.22e-05	7.41e-05	-0.0407566	-0.0585702	-0.022943	4	32
Acholeplasma	0	0.0267861	1.41e-05	8.5e-05	-0.0267861	-0.0391588	-0.0144134	0	18
Pantoea	0.0343159	0.00297623	1.68e-05	9.99e-05	0.0313397	0.0157475	0.0469319	20	2
Ornatilinea	0.0308843	0.00148812	1.78e-05	0.000104927	0.0293962	0.0148357	0.0439567	18	1
Sulfurovum	0.0137264	0.0610128	1.81e-05	0.000105807	-0.0472864	-0.0682395	-0.0263334	8	41
Caulobacter	0.0017158	0.0327386	2e-05	0.000116049	-0.0310228	-0.0451082	-0.0169374	1	22
Nocardioides	0	0.025298	2.67e-05	0.000152936	-0.025298	-0.0373222	-0.0132738	0	17
Kroppenstedtia	0	0.025298	2.67e-05	0.000151507	-0.025298	-0.0373222	-0.0132738	0	17
Acetobacterium	0.0154422	0.0625009	2.82e-05	0.000158835	-0.0470588	-0.0684791	-0.0256384	9	42
Macellibacteroides	0.0223053	0	4.68e-05	0.000256273	0.0223053	0.0101816	0.0344291	13	0
Gp1	0.0223053	0	4.68e-05	0.000260976	0.0223053	0.0101816	0.0344291	13	0
Ethanoligenens	0.0223053	0	4.68e-05	0.000253985	0.0223053	0.0101816	0.0344291	13	0
Meiothermus	0.0223053	0	4.68e-05	0.000258603	0.0223053	0.0101816	0.0344291	13	0
Macrococcus	0	0.0238099	5.04e-05	0.000271264	-0.0238099	-0.0354751	-0.0121446	0	16
Coprobacillus	0	0.0238099	5.04e-05	0.000268884	-0.0238099	-0.0354751	-0.0121446	0	16
Butyricicoccus	0.00514739	0.0372029	8.19e-05	0.000433118	-0.0320555	-0.0477565	-0.0163546	3	25
Pelotomaculum	0.144127	0.242563	9.1e-05	0.000476742	-0.0984363	-0.146726	-0.050147	84	163
Gemmobacter	0	0.0223218	9.55e-05	0.000496225	-0.0223218	-0.0336167	-0.0110269	0	15
Anaerocella	0.0188738	0.063989	9.68e-05	0.000498588	-0.0451153	-0.0672498	-0.0229807	11	43
Gp6	0.0205895	0	0.000100743	0.00051472	0.0205895	0.00894133	0.0322378	12	0
Carnobacterium	0.0205895	0	0.000100743	0.000506212	0.0205895	0.00894133	0.0322378	12	0
Azoarcus	0.0205895	0	0.000100743	0.000510431	0.0205895	0.00894133	0.0322378	12	0
Methanosarcina	0.0394633	0.0967276	0.000104081	0.0005187	-0.0572643	-0.0857673	-0.0287614	23	65
Bilophila	0.0017158	0.0282742	0.000129323	0.000639255	-0.0265584	-0.0397074	-0.0134095	1	19
Corynebacterium	0.0017158	0.0282742	0.000129323	0.000629026	-0.0265584	-0.0397074	-0.0134095	1	19
Actinomyces	0.0017158	0.0282742	0.000129323	0.000634099	-0.0265584	-0.0397074	-0.0134095	1	19
Sphingomonas	0.0446107	0.104168	0.000129372	0.000624269	-0.0595575	-0.0893697	-0.0297453	26	70
Gluconacetobacter	0.0549055	0.0148812	0.000135241	0.000647454	0.0400243	0.0188879	0.0611607	32	10
Holdemanella	0	0.0208336	0.000181211	0.000860754	-0.0208336	-0.0317456	-0.00992165	0	14
Psychrosinus	0.0634844	0.0208336	0.000202552	0.000954666	0.0426508	0.0194723	0.0658293	37	14
Terrimonas	0.0188738	0	0.000216921	0.00101452	0.0188738	0.00772134	0.0300262	11	0
Gluconobacter	0.0188738	0	0.000216921	0.00100678	0.0188738	0.00772134	0.0300262	11	0
Methanocorpusculum	0.0188738	0	0.000216921	0.000999152	0.0188738	0.00772134	0.0300262	11	0
Anaerofustis	0.0017158	0.025298	0.000239853	0.00109647	-0.0235822	-0.0360678	-0.0110966	1	17
Methylobacterium	0.0137264	0.050596	0.000288518	0.00130909	-0.0368696	-0.0563516	-0.0173876	8	34
Rhizobium	0	0.0193455	0.000344617	0.00155205	-0.0193455	-0.0298607	-0.00883039	0	13
Clostridium XlVb	0.0274527	0.0729178	0.000412762	0.00184529	-0.045465	-0.0699074	-0.0210227	16	49
Oxobacter	0.0531897	0.0163693	0.000498868	0.00221396	0.0368204	0.0157501	0.0578906	31	11
Saccharopolyspora	0	0.0178574	0.000656929	0.00287347	-0.0178574	-0.0279601	-0.00775472	0	12
Rhizobacter	0	0.0178574	0.000656929	0.00289429	-0.0178574	-0.0279601	-0.00775472	0	12
Allisonella	0.0017158	0.0223218	0.000771615	0.00335101	-0.020606	-0.0323909	-0.00882107	1	15
Anaerorhabdus	0.00857898	0.0372029	0.00082248	0.00354658	-0.028624	-0.0450292	-0.0122187	5	25
Phaeodactylibacter	0.0154422	0	0.00100569	0.00430606	0.0154422	0.00535425	0.0255301	9	0
Exiguobacterium	0.00343159	0.0267861	0.00104811	0.0044563	-0.0233545	-0.0366097	-0.0100993	2	18
Sediminibacterium	0	0.0163693	0.00125557	0.00522867	-0.0163693	-0.026042	-0.00669663	0	11
Thermoactinomyces	0	0.0163693	0.00125557	0.00530129	-0.0163693	-0.026042	-0.00669663	0	11
Propionibacterium	0	0.0163693	0.00125557	0.0051931	-0.0163693	-0.026042	-0.00669663	0	11
Planococcus	0	0.0163693	0.00125557	0.00526473	-0.0163693	-0.026042	-0.00669663	0	11
Saccharofermentans	0.0102948	0.0401792	0.00128209	0.00526698	-0.0298844	-0.0471309	-0.0126379	6	27
Klebsiella	0.219622	0.144347	0.00202301	0.00825498	0.0752745	0.0276472	0.122902	128	97
Metallibacterium	0.0137264	0	0.00216541	0.008719	0.0137264	0.00421531	0.0232374	8	0
Aureitalea	0.0137264	0	0.00216541	0.00866164	0.0137264	0.00421531	0.0232374	8	0
Hymenobacter	0.0137264	0	0.00216541	0.00877713	0.0137264	0.00421531	0.0232374	8	0
Sulfurimonas	0	0.0148812	0.00240668	0.00956379	-0.0148812	-0.0241038	-0.00565858	0	10
Nitrolancea	0.0017158	0.0193455	0.00246889	0.0097473	-0.0176297	-0.0286695	-0.00658994	1	13
Hydrogenophaga	0.00343159	0.0238099	0.00322038	0.0126322	-0.0203783	-0.0329757	-0.00778086	2	16
Povalibacter	0.017158	0.00148812	0.00400724	0.015618	0.0156698	0.00464359	0.0266961	10	1
Sandaracinus	0	0.0133931	0.00462775	0.017808	-0.0133931	-0.0221424	-0.00464367	0	9
Serinicoccus	0	0.0133931	0.00462775	0.017696	-0.0133931	-0.0221424	-0.00464367	0	9
Fonticella	0	0.0133931	0.00462775	0.0179215	-0.0133931	-0.0221424	-0.00464367	0	9
Gp2	0.0120106	0	0.00466242	0.0176072	0.0120106	0.00311371	0.0209074	7	0
Nitrospira	0.0120106	0	0.00466242	0.0177172	0.0120106	0.00311371	0.0209074	7	0
Paracoccus	0.0120106	0	0.00466242	0.0173911	0.0120106	0.00311371	0.0209074	7	0
Acidisoma	0.0120106	0	0.00466242	0.0174985	0.0120106	0.00311371	0.0209074	7	0
Pelospora	0.0463265	0.089287	0.00488664	0.0181163	-0.0429606	-0.0715116	-0.0144095	27	60
Dechloromonas	0.0205895	0.00297623	0.00509858	0.0187875	0.0176133	0.00525636	0.0299703	12	2
Subdivision3_genera_incertae_sedis	0.0223053	0.00446435	0.0055448	0.0203087	0.017841	0.00470688	0.0309751	13	3
Subdivision5_genera_incertae_sedis	0.0017158	0.0163693	0.00784061	0.0285454	-0.0146535	-0.0248941	-0.00441292	1	11
Caloribacterium	0	0.0119049	0.00892927	0.0323155	-0.0119049	-0.020154	-0.00365588	0	8
Hydrogenoanaerobacterium	0	0.0119049	0.00892927	0.0321242	-0.0119049	-0.020154	-0.00365588	0	8
Oxalobacter	0	0.0119049	0.00892927	0.0317485	-0.0119049	-0.020154	-0.00365588	0	8
Oceanimonas	0	0.0119049	0.00892927	0.0319353	-0.0119049	-0.020154	-0.00365588	0	8
Sanguibacter	0	0.0119049	0.00892927	0.0313815	-0.0119049	-0.020154	-0.00365588	0	8
Planomicrobium	0	0.0119049	0.00892927	0.0315639	-0.0119049	-0.020154	-0.00365588	0	8
Cloacibacterium	0.00343159	0.0193455	0.00953821	0.0333289	-0.0159139	-0.0274545	-0.00437333	2	13
Methylobacter	0.00343159	0.0208336	0.00967434	0.0336114	-0.0174021	-0.0293054	-0.00549874	2	14
Achromobacter	0.0102948	0	0.0100387	0.034098	0.0102948	0.00205782	0.0185317	6	0
Advenella	0.0102948	0	0.0100387	0.0339086	0.0102948	0.00205782	0.0185317	6	0
Dokdonella	0.0102948	0	0.0100387	0.0344833	0.0102948	0.00205782	0.0185317	6	0
Sulfuritalea	0.0102948	0	0.0100387	0.0342896	0.0102948	0.00205782	0.0185317	6	0
Lactivibrio	0.0102948	0	0.0100387	0.0346793	0.0102948	0.00205782	0.0185317	6	0
Gemmatimonas	0.0291685	0.0089287	0.0107786	0.0362067	0.0202398	0.00464383	0.0358358	17	6
Flavonifractor	0.135548	0.193455	0.0124118	0.0414636	-0.0579074	-0.102584	-0.0132312	79	130
Dethiobacter	0.00343159	0.0178574	0.0160194	0.0532228	-0.0144258	-0.0255919	-0.00325972	2	12
Citricoccus	0	0.0104168	0.0172932	0.0562261	-0.0104168	-0.0181332	-0.00270048	0	7
Tetrasphaera	0	0.0104168	0.0172932	0.0571428	-0.0104168	-0.0181332	-0.00270048	0	7
Erysipelotrichaceae_incertae_sedis	0	0.0104168	0.0172932	0.0568339	-0.0104168	-0.0181332	-0.00270048	0	7
Asinibacterium	0	0.0104168	0.0172932	0.0565284	-0.0104168	-0.0181332	-0.00270048	0	7
Arthrobacter	0.113243	0.0729178	0.0193957	0.0627265	0.0403248	0.00623535	0.0744142	66	49
Gelria	0.0326001	0.0625009	0.0201381	0.0647828	-0.0299008	-0.0538146	-0.00598704	19	42
Ignavibacterium	0.00857898	0	0.0216144	0.069166	0.00857898	0.00105963	0.0160983	5	0
Nitrosospira	0.00857898	0	0.0216144	0.0677399	0.00857898	0.00105963	0.0160983	5	0
Brevibacillus	0.00857898	0	0.0216144	0.0670486	0.00857898	0.00105963	0.0160983	5	0
Candidatus Solibacter	0.00857898	0	0.0216144	0.0680908	0.00857898	0.00105963	0.0160983	5	0
Reyranella	0.00857898	0	0.0216144	0.0673925	0.00857898	0.00105963	0.0160983	5	0
WPS-1_genera_incertae_sedis	0.00857898	0	0.0216144	0.0684455	0.00857898	0.00105963	0.0160983	5	0
Gibbsiella	0.00857898	0	0.0216144	0.0667083	0.00857898	0.00105963	0.0160983	5	0
Pelolinea	0.00857898	0	0.0216144	0.0688038	0.00857898	0.00105963	0.0160983	5	0
Tissierella	0.559349	0.659236	0.0245253	0.0753099	-0.0998866	-0.185967	-0.0138062	326	443
Enhydrobacter	0.0017158	0.0133931	0.0246174	0.0748369	-0.0116773	-0.0210507	-0.00230386	1	9
Methylocystis	0.0017158	0.0133931	0.0246174	0.0752129	-0.0116773	-0.0210507	-0.00230386	1	9
Paenibacillus	0.0154422	0.00297623	0.0297834	0.089645	0.0124659	0.00156734	0.0233645	9	2
Armatimonadetes_gp5	0.0154422	0.00297623	0.0297834	0.090091	0.0124659	0.00156734	0.0233645	9	2
BRC1_genera_incertae_sedis	0	0.0089287	0.0336253	0.0978189	-0.0089287	-0.0160727	-0.0017847	0	6
Methylophilus	0	0.0089287	0.0336253	0.100216	-0.0089287	-0.0160727	-0.0017847	0	6
Oligosphaera	0	0.0089287	0.0336253	0.10071	-0.0089287	-0.0160727	-0.0017847	0	6
Asticcacaulis	0	0.0089287	0.0336253	0.0968918	-0.0089287	-0.0160727	-0.0017847	0	6
Aminicenantes_genera_incertae_sedis	0	0.0089287	0.0336253	0.0987641	-0.0089287	-0.0160727	-0.0017847	0	6
Methylosarcina	0	0.0089287	0.0336253	0.0992435	-0.0089287	-0.0160727	-0.0017847	0	6
Methylomicrobium	0	0.0089287	0.0336253	0.0982892	-0.0089287	-0.0160727	-0.0017847	0	6
Sphaerochaeta	0	0.0089287	0.0336253	0.0997276	-0.0089287	-0.0160727	-0.0017847	0	6
Dyadobacter	0	0.0089287	0.0336253	0.0973531	-0.0089287	-0.0160727	-0.0017847	0	6
Armatimonadetes_gp2	0.0205895	0.0416673	0.0395946	0.113554	-0.0210777	-0.040411	-0.00174449	12	28
Sporotomaculum	0.00514739	0.0193455	0.041477	0.118394	-0.0141981	-0.0262187	-0.00217759	3	13
Pseudoxanthomonas	0.0017158	0.0119049	0.0433414	0.121998	-0.0101891	-0.0190973	-0.00128095	1	8
Roseomonas	0.0017158	0.0119049	0.0433414	0.122566	-0.0101891	-0.0190973	-0.00128095	1	8
Thiobacillus	0.0017158	0.0119049	0.0433414	0.121436	-0.0101891	-0.0190973	-0.00128095	1	8
Pseudoscardovia	0.0017158	0.0119049	0.0433414	0.123138	-0.0101891	-0.0190973	-0.00128095	1	8
WPS-2_genera_incertae_sedis	0.00686318	0	0.0465374	0.128612	0.00686318	0.000137618	0.0135887	4	0
Leuconostoc	0.00686318	0	0.0465374	0.12803	0.00686318	0.000137618	0.0135887	4	0
Ktedonobacter	0.00686318	0	0.0465374	0.125754	0.00686318	0.000137618	0.0135887	4	0
Anoxynatronum	0.00686318	0	0.0465374	0.127454	0.00686318	0.000137618	0.0135887	4	0
Spartobacteria_genera_incertae_sedis	0.00686318	0	0.0465374	0.1292	0.00686318	0.000137618	0.0135887	4	0
Terrisporobacter	0.00686318	0	0.0465374	0.126316	0.00686318	0.000137618	0.0135887	4	0
Aridibacter	0.00686318	0	0.0465374	0.129792	0.00686318	0.000137618	0.0135887	4	0
Gp5	0.00686318	0	0.0465374	0.126882	0.00686318	0.000137618	0.0135887	4	0
Anaerotruncus	0.00857898	0.0238099	0.0474916	0.127765	-0.0152309	-0.0291096	-0.0013522	5	16

## Sheet: YJ-X versus YJ-Z
Genus level difference of microorganism population between YJ-X and YJ-Z
Genus	Freq1	Freq2	pValue	qValue	Effect Size	95.0% lower CI	95.0% upper CI	YJ-X	YJ-Z
unclassified	35.5407	12.7464	0	0	22.7943	22.3285	23.2601	23883	6331
Aminobacterium	1.74705	25.0357	0	0	-23.2887	-23.6823	-22.895	1174	12435
Clostridium IV	2.63099	21.3936	0	0	-18.7626	-19.143	-18.3822	1768	10626
Caloramator	0.955371	17.0126	0	0	-16.0573	-16.3958	-15.7187	642	8450
Bifidobacterium	4.70692	0.0422799	0	0	4.66464	4.50349	4.82578	3163	21
Bacteroides	4.16226	0.0664398	0	0	4.09582	3.94313	4.24852	2797	33
Faecalibacterium	3.87952	0.201333	0	0	3.67819	3.52696	3.82942	2607	100
Olsenella	0.0297623	1.91266	1.64899349956e-319	1.25323505967e-317	-1.8829	-2.00406	-1.76174	20	950
Petrimonas	2.83486	0.259719	3.67e-303	2.48e-301	2.57514	2.44192	2.70837	1905	129
Blautia	2.05509	0.0422799	1.35e-296	8.19e-295	2.01281	1.90403	2.12159	1381	21
Clostridium sensu stricto	3.8319	0.759025	2.93e-277	1.62e-275	3.07288	2.90889	3.23686	2575	377
Proteiniphilum	3.54618	0.684532	4.54e-261	2.3e-259	2.86165	2.70414	3.01917	2383	340
Lactobacillus	6.49266	2.48646	2.93e-237	1.37e-235	4.0062	3.77499	4.23741	4363	1235
Alistipes	1.31698	0.0281866	3.17e-189	1.38e-187	1.2888	1.20135	1.37625	885	14
Gemmiger	0.955371	0.0402666	6.89e-125	2.79e-123	0.915105	0.839471	0.990739	642	20
Roseburia	1.13692	0.112746	4.66e-118	1.77e-116	1.02418	0.938756	1.10959	764	56
Burkholderia	1.06698	0.0986531	1.14e-113	4.08e-112	0.968327	0.885886	1.05077	717	49
Garciella	0.212801	1.25028	8.19e-108	2.77e-106	-1.03748	-1.14122	-0.933732	143	621
Methanobacterium	0.0163693	0.664398	4.61e-106	1.47e-104	-0.648029	-0.720126	-0.575932	11	330
Syntrophomonas	3.40779	1.47577	5.68e-100	1.73e-98	1.93202	1.75863	2.1054	2290	733
Collinsella	0.65626	0.0201333	1.55e-90	4.48e-89	0.636126	0.573816	0.698437	441	10
Clostridium XlVa	0.846739	0.0966398	1.95e-83	5.4e-82	0.750099	0.675627	0.824571	569	48
Anaerostipes	0.629474	0.0261733	8.06e-83	2.13e-81	0.6033	0.541834	0.664767	423	13
Barnesiella	0.491079	0.00805331	6.53e-73	1.65e-71	0.483025	0.429586	0.536465	330	4
Parabacteroides	0.470245	0.00603999	6.81e-71	1.66e-69	0.464205	0.41203	0.51638	316	3
Ralstonia	0.419649	0	1.76e-68	4.11e-67	0.419649	0.370773	0.468525	282	0
Lachnospiracea_incertae_sedis	0.5134	0.0301999	4.55e-63	1.02e-61	0.483201	0.427046	0.539355	345	15
Oscillibacter	0.514889	0.0322133	2.08e-62	4.51e-61	0.482675	0.426308	0.539043	346	16
Syntrophaceticus	0.305064	1.0872	7.65e-62	1.6e-60	-0.782133	-0.882411	-0.681855	205	540
Fusicatenibacter	0.428578	0.0140933	6.87e-59	1.39e-57	0.414485	0.364002	0.464967	288	7
Clostridium III	0.784238	0.16308	3.81e-55	7.48e-54	0.621158	0.545612	0.696704	527	81
Fonticella	0.0133931	0.356359	6.11e-54	1.16e-52	-0.342966	-0.396097	-0.289836	9	177
Tissierella	0.659236	1.6006	1.15e-53	2.11e-52	-0.94136	-1.06755	-0.815167	443	795
Ruminococcus2	0.372029	0.01812	8.46e-48	1.51e-46	0.353909	0.306381	0.401438	250	9
Methanomassiliicoccus	0.223218	0.797278	7.75e-46	1.35e-44	-0.57406	-0.660027	-0.488094	150	396
Sedimentibacter	0.970253	1.92877	2.97e-43	5.01e-42	-0.958516	-1.10037	-0.816663	652	958
Intestinimonas	0.453876	0.0583865	7.28e-43	1.2e-41	0.395489	0.340406	0.450572	305	29
Akkermansia	0.302088	0.01208	1.46e-40	2.34e-39	0.290008	0.247404	0.332612	203	6
Clostridium XVIII	0.261909	0.00402666	1.65e-39	2.57e-38	0.257882	0.218838	0.296926	176	2
Megasphaera	0.247027	0.00201333	1.72e-38	2.62e-37	0.245014	0.207275	0.282753	166	1
Tepidimicrobium	0.135419	0.557692	3.1e-37	4.6e-36	-0.422273	-0.493423	-0.351124	91	277
Streptococcus	0.257444	0.0100666	8.7e-35	1.26e-33	0.247378	0.208062	0.286694	173	5
Eubacterium	0.211313	0	1.25e-34	1.77e-33	0.211313	0.176593	0.246032	142	0
Chitinophaga	0.191967	0	1.8e-31	2.48e-30	0.191967	0.158872	0.225062	129	0
Dorea	0.260421	0.01812	3.62e-31	4.89e-30	0.242301	0.20199	0.282611	175	9
Acinetobacter	0.507448	0.140933	2.95e-28	3.91e-27	0.366515	0.303471	0.429559	341	70
Eisenbergiella	0.169645	0	4.27e-28	5.52e-27	0.169645	0.13853	0.20076	114	0
Tepidanaerobacter	0.0967276	0.398639	4.22e-27	5.35e-26	-0.301911	-0.362105	-0.241718	65	198
Ruminococcus	0.267861	0.0362399	3.7e-25	4.59e-24	0.231621	0.189109	0.274134	180	18
Haloplasma	0.025298	0.209386	6.54e-23	7.95e-22	-0.184088	-0.226048	-0.142129	17	104
Parasutterella	0.178574	0.01812	2.82e-19	3.37e-18	0.160454	0.126408	0.1945	120	9
Bacillus	0.147324	0.00805331	4.61e-19	5.39e-18	0.13927	0.109217	0.169324	99	4
Proteiniborus	0.0089287	0.134893	8.14e-19	9.33e-18	-0.125964	-0.159023	-0.0929051	6	67
Enterococcus	0.105656	0	1.23e-17	1.39e-16	0.105656	0.0810931	0.13022	71	0
Flavonifractor	0.193455	0.0301999	3.25e-17	3.59e-16	0.163255	0.126687	0.199824	130	15
Odoribacter	0.108633	0.00201333	1.48e-16	1.6e-15	0.106619	0.0814022	0.131836	73	1
Gelria	0.0625009	0.243613	2.36e-16	2.52e-15	-0.181112	-0.228405	-0.133819	42	121
Prevotella	0.111609	0.00402666	5.73e-16	6.01e-15	0.107582	0.0817278	0.133436	75	2
Paraprevotella	0.113097	0.00402666	5.93e-16	6.11e-15	0.10907	0.0830523	0.135088	76	2
Escherichia/Shigella	0.0446435	0.195293	9.45e-15	9.57e-14	-0.150649	-0.192632	-0.108666	30	97
Pelotomaculum	0.242563	0.0684532	5.04e-14	5.02e-13	0.17411	0.13038	0.21784	163	34
Undibacterium	0.0863108	0.00201333	3.27e-13	3.21e-12	0.0842975	0.0617465	0.106848	58	1
Intestinibacter	0.0848227	0.00201333	5.74e-13	5.54e-12	0.0828094	0.0604475	0.105171	57	1
Lysinibacillus	0.1503	0.0261733	6.12e-13	5.82e-12	0.124127	0.0915647	0.156689	101	13
Sporobacter	0.187503	0.0463065	1.6e-12	1.49e-11	0.141196	0.10341	0.178983	126	23
Pelospora	0.089287	0.00402666	1.73e-12	1.59e-11	0.0852604	0.0619989	0.108522	60	2
Listeria	0.0699415	0	7.2e-12	6.53e-11	0.0699415	0.0499529	0.0899301	47	0
Phascolarctobacterium	0.122026	0.0221466	1.49e-10	1.34e-09	0.099879	0.0704179	0.12934	82	11
Atribacteria_genera_incertae_sedis	0	0.0523465	2.17e-10	1.91e-09	-0.0523465	-0.0724623	-0.0322308	0	26
Kozakia	0	0.0523465	2.17e-10	1.88e-09	-0.0523465	-0.0724623	-0.0322308	0	26
Arthrobacter	0.0729178	0.00402666	5.24e-10	4.49e-09	0.0688911	0.0477328	0.0900494	49	2
Natranaerovirga	0.0163693	0.0986531	6.23e-10	5.26e-09	-0.0822838	-0.111538	-0.0530297	11	49
Phenylobacterium	0.075894	0.00603999	1.93e-09	1.59e-08	0.069854	0.0479398	0.0917682	51	3
Bradyrhizobium	0.075894	0.00603999	1.93e-09	1.61e-08	0.069854	0.0479398	0.0917682	51	3
Simplicispira	0.0119049	0.0825465	4.73e-09	3.84e-08	-0.0706415	-0.0972111	-0.0440719	8	41
Lactivibrio	0	0.0442932	6.66e-09	5.33e-08	-0.0442932	-0.0627977	-0.0257887	0	22
Eggerthella	0.0699415	0.00603999	1.01e-08	7.95e-08	0.0639015	0.0427768	0.0850263	47	3
Methanoculleus	0.30804	0.519439	1.9e-08	1.48e-07	-0.211398	-0.287241	-0.135556	207	258
Gp4	0	0.0402666	3.69e-08	2.84e-07	-0.0402666	-0.0579103	-0.0226228	0	20
Dialister	0.0520841	0.153013	4.01e-08	3.05e-07	-0.100929	-0.139389	-0.0624685	35	76
Methanobrevibacter	0.0133931	0.0785198	6.61e-08	4.96e-07	-0.0651267	-0.0912678	-0.0389857	9	39
Sphingomonas	0.104168	0.0241599	7.28e-08	5.4e-07	0.0800083	0.0520499	0.107967	70	12
Gp1	0	0.0382532	8.68e-08	6.36e-07	-0.0382532	-0.0554504	-0.0210561	0	19
Subdivision3_genera_incertae_sedis	0.00446435	0.0543599	1.39e-07	1e-06	-0.0498955	-0.0710075	-0.0287835	3	27
Gp6	0	0.0342266	4.81e-07	3.44e-06	-0.0342266	-0.0504938	-0.0179594	0	17
Alkalibaculum	0.141371	0.0523465	1.88e-06	1.33e-05	0.0890246	0.0542158	0.123833	95	26
Desulfotomaculum	0.0357148	0	2.35e-06	1.64e-05	0.0357148	0.0214287	0.0500009	24	0
Bosea	0.0461316	0.00402666	4.34e-06	3e-05	0.042105	0.0249372	0.0592728	31	2
Hydrogenispora	0.0461316	0.00402666	4.34e-06	2.96e-05	0.042105	0.0249372	0.0592728	31	2
Cloacibacillus	0.0386911	0.110733	4.7e-06	3.17e-05	-0.072042	-0.104853	-0.0392309	26	55
Coprococcus	0.0565485	0.00805331	5.15e-06	3.44e-05	0.0484951	0.0288646	0.0681257	38	4
Rudaea	0.00148812	0.0322133	1.15e-05	7.63e-05	-0.0307251	-0.046774	-0.0146762	1	16
Anaerocella	0.063989	0.146973	1.2e-05	7.83e-05	-0.0829839	-0.121721	-0.0442464	43	73
Staphylococcus	0.0431554	0.00402666	1.25e-05	8.09e-05	0.0391287	0.0224634	0.0557941	29	2
Gaiella	0.00744059	0.0483199	1.29e-05	8.24e-05	-0.0408793	-0.0612769	-0.0204817	5	24
Butyricicoccus	0.0372029	0.00201333	1.29e-05	8.18e-05	0.0351896	0.0200845	0.0502947	25	1
Lutispora	0.42709	0.612052	1.37e-05	8.57e-05	-0.184962	-0.269436	-0.100489	287	304
Nitrosomonas	0	0.0261733	1.47e-05	9.15e-05	-0.0261733	-0.0403991	-0.0119474	0	13
Pseudomonas	0.0907752	0.0281866	1.81e-05	0.000111447	0.0625886	0.0354521	0.089725	61	14
Brevundimonas	0.0610128	0.01208	1.96e-05	0.000119433	0.0489328	0.0279094	0.0699563	41	6
Polynucleobacter	0.0282742	0	2.94e-05	0.000177186	0.0282742	0.0155626	0.0409858	19	0
Holdemania	0.0282742	0	2.94e-05	0.000175449	0.0282742	0.0155626	0.0409858	19	0
Meiothermus	0	0.0241599	3.47e-05	0.000204839	-0.0241599	-0.0378278	-0.0104921	0	12
Sulfurovum	0.0610128	0.0140933	5.2e-05	0.000304102	0.0469195	0.025529	0.06831	41	7
Exiguobacterium	0.0267861	0	5.23e-05	0.000303089	0.0267861	0.0144134	0.0391588	18	0
Anaerovorax	0.239587	0.134893	5.26e-05	0.00030174	0.104694	0.0556205	0.153767	161	67
Candidatus Cloacamonas	0.144347	0.0664398	5.73e-05	0.000325612	0.0779076	0.0413359	0.114479	97	33
Kroppenstedtia	0.025298	0	9.36e-05	0.000526772	0.025298	0.0132738	0.0373222	17	0
Sporanaerobacter	0.398815	0.265759	0.000113073	0.000630719	0.133056	0.0673241	0.198788	268	132
Methylobacterium	0.050596	0.0100666	0.000120716	0.000667231	0.0405293	0.0213738	0.0596849	34	5
Christensenella	0.0610128	0.0161066	0.000128587	0.000704334	0.0449062	0.0231549	0.0666575	41	8
Aquamicrobium	0.00446435	0.0342266	0.000133701	0.000725803	-0.0297622	-0.0467958	-0.0127287	3	17
Coprobacillus	0.0238099	0	0.000168305	0.000905573	0.0238099	0.0121446	0.0354751	16	0
Gemmobacter	0.0223218	0	0.000304867	0.00161182	0.0223218	0.0110269	0.0336167	15	0
Allisonella	0.0223218	0	0.000304867	0.00162596	0.0223218	0.0110269	0.0336167	15	0
Actinomyces	0.0282742	0.00201333	0.000364215	0.00190899	0.0262609	0.0129509	0.0395709	19	1
Corynebacterium	0.0282742	0.00201333	0.000364215	0.00189267	0.0262609	0.0129509	0.0395709	19	1
Ferruginibacter	0	0.01812	0.000452197	0.00232996	-0.01812	-0.029957	-0.00628287	0	9
Citrobacter	0	0.01812	0.000452197	0.00231038	-0.01812	-0.029957	-0.00628287	0	9
Geobacter	0.0104168	0.0442932	0.000459491	0.00232809	-0.0338764	-0.0539253	-0.0138275	7	22
Gemmatimonas	0.0089287	0.0402666	0.000495877	0.00249168	-0.0313379	-0.050373	-0.0123027	6	20
Longilinea	0.00595247	0.0342266	0.000520997	0.00259645	-0.0282741	-0.0455555	-0.0109927	4	17
Caulobacter	0.0327386	0.00402666	0.000570533	0.00279745	0.0287119	0.0139393	0.0434846	22	2
Trichococcus	0.0327386	0.00402666	0.000570533	0.0028202	0.0287119	0.0139393	0.0434846	22	2
Acholeplasma	0.0267861	0.00201333	0.000646024	0.00314226	0.0247728	0.0117861	0.0377595	18	1
Saccharofermentans	0.0401792	0.00805331	0.000755735	0.00364672	0.0321259	0.0150415	0.0492102	27	4
Armatimonadetes_gp5	0.00297623	0.0261733	0.000816894	0.0039108	-0.023197	-0.0380088	-0.0083853	2	13
Cloacibacterium	0.0193455	0	0.00102485	0.00486805	0.0193455	0.00883039	0.0298607	13	0
Nitrolancea	0.0193455	0	0.00102485	0.00483031	0.0193455	0.00883039	0.0298607	13	0
Nitrospira	0	0.0161066	0.00106409	0.00493867	-0.0161066	-0.0272668	-0.00494641	0	8
Acidipila	0	0.0161066	0.00106409	0.0048644	-0.0161066	-0.0272668	-0.00494641	0	8
Thauera	0	0.0161066	0.00106409	0.00497666	-0.0161066	-0.0272668	-0.00494641	0	8
Aridibacter	0	0.0161066	0.00106409	0.00490126	-0.0161066	-0.0272668	-0.00494641	0	8
Acetobacterium	0.0625009	0.0221466	0.00120995	0.00548993	0.0403543	0.0173693	0.0633394	42	11
Aeromonas	0.00744059	0.0342266	0.00172784	0.0077817	-0.026786	-0.0443118	-0.00926021	5	17
Rhizobacter	0.0178574	0	0.00190386	0.00851135	0.0178574	0.00775472	0.0279601	12	0
Saccharopolyspora	0.0178574	0	0.00190386	0.00844922	0.0178574	0.00775472	0.0279601	12	0
Gp3	0.0119049	0.0422799	0.00202364	0.00891573	-0.030375	-0.0502472	-0.0105027	8	21
Macrococcus	0.0238099	0.00201333	0.00205462	0.00885962	0.0217966	0.00948198	0.0341111	16	1
Hydrogenophaga	0.0238099	0.00201333	0.00205462	0.0089229	0.0217966	0.00948198	0.0341111	16	1
Kurthia	0.0238099	0.00201333	0.00205462	0.0089871	0.0217966	0.00948198	0.0341111	16	1
Gp2	0	0.0140933	0.00250394	0.0107211	-0.0140933	-0.0245328	-0.00365376	0	7
Kineococcus	0	0.0140933	0.00250394	0.0106461	-0.0140933	-0.0245328	-0.00365376	0	7
Dehalobacter	0.00148812	0.01812	0.00279249	0.0117905	-0.0166318	-0.0288229	-0.00444072	1	9
Methanosarcina	0.0967276	0.0483199	0.00353297	0.0148141	0.0484078	0.0179784	0.0788371	65	24
Propionibacterium	0.0163693	0	0.00356805	0.0146579	0.0163693	0.00669663	0.026042	11	0
Sediminibacterium	0.0163693	0	0.00356805	0.0147576	0.0163693	0.00669663	0.026042	11	0
Subdivision5_genera_incertae_sedis	0.0163693	0	0.00356805	0.0148587	0.0163693	0.00669663	0.026042	11	0
Nocardioides	0.025298	0.00402666	0.00430907	0.0175833	0.0212713	0.00801533	0.0345274	17	2
Albidovulum	0	0.01208	0.00589201	0.023414	-0.01208	-0.0217452	-0.00241474	0	6
Phaeodactylibacter	0	0.01208	0.00589201	0.0238823	-0.01208	-0.0217452	-0.00241474	0	6
Bdellovibrio	0	0.01208	0.00589201	0.023568	-0.01208	-0.0217452	-0.00241474	0	6
Pyramidobacter	0	0.01208	0.00589201	0.0237241	-0.01208	-0.0217452	-0.00241474	0	6
Bilophila	0.0282742	0.00603999	0.00798809	0.0313339	0.0222342	0.00780177	0.0366667	19	3
Cellulosibacter	0.0282742	0.00603999	0.00798809	0.0315374	0.0222342	0.00780177	0.0366667	19	3
Armatimonadetes_gp2	0.0416673	0.0140933	0.00925235	0.0360605	0.027574	0.00894398	0.046204	28	7
Anaerorhabdus	0.0372029	0.01208	0.0100105	0.038767	0.025123	0.00762983	0.0426161	25	6
Weissella	0.0163693	0.0422799	0.011222	0.0431835	-0.0259106	-0.0464147	-0.00540646	11	21
Pantoea	0.00297623	0.01812	0.0117921	0.045092	-0.0151437	-0.0276789	-0.00260858	2	9
Treponema	0.0297623	0.00805331	0.0118272	0.0449433	0.021709	0.00646544	0.0369526	20	4
Povalibacter	0.00148812	0.0140933	0.0125829	0.0472246	-0.0126052	-0.0234445	-0.00176587	1	7
Ornatilinea	0.00148812	0.0140933	0.0125829	0.0475179	-0.0126052	-0.0234445	-0.00176587	1	7
Leucobacter	0.0133931	0	0.0128284	0.0478508	0.0133931	0.00464367	0.0221424	9	0
Enhydrobacter	0.0133931	0	0.0128284	0.047559	0.0133931	0.00464367	0.0221424	9	0
Serinicoccus	0.0133931	0	0.0128284	0.046986	0.0133931	0.00464367	0.0221424	9	0
Sandaracinus	0.0133931	0	0.0128284	0.0472708	0.0133931	0.00464367	0.0221424	9	0
Pelolinea	0	0.0100666	0.0138643	0.0501757	-0.0100666	-0.0188898	-0.00124345	0	5
Thermogutta	0	0.0100666	0.0138643	0.0495854	-0.0100666	-0.0188898	-0.00124345	0	5
Ignavibacterium	0	0.0100666	0.0138643	0.0504761	-0.0100666	-0.0188898	-0.00124345	0	5
Leptolinea	0	0.0100666	0.0138643	0.0498788	-0.0100666	-0.0188898	-0.00124345	0	5
Sphingobacterium	0.0163693	0.00201333	0.0176802	0.062863	0.014356	0.00390936	0.0248026	11	1
Planococcus	0.0163693	0.00201333	0.0176802	0.0624976	0.014356	0.00390936	0.0248026	11	1
Acidovorax	0.0208336	0.00402666	0.0199386	0.0700734	0.016807	0.00455085	0.0290631	14	2
Asinibacterium	0.0104168	0	0.0232824	0.08043	0.0104168	0.00270048	0.0181332	7	0
Citricoccus	0.0104168	0	0.0232824	0.0799756	0.0104168	0.00270048	0.0181332	7	0
Adhaeribacter	0.0104168	0	0.0232824	0.0813545	0.0104168	0.00270048	0.0181332	7	0
Erysipelotrichaceae_incertae_sedis	0.0104168	0	0.0232824	0.0808896	0.0104168	0.00270048	0.0181332	7	0
Pseudoxanthomonas	0.0119049	0	0.0245299	0.0837876	0.0119049	0.00365588	0.020154	8	0
Planomicrobium	0.0119049	0	0.0245299	0.0819461	0.0119049	0.00365588	0.020154	8	0
Oxalobacter	0.0119049	0	0.0245299	0.0823988	0.0119049	0.00365588	0.020154	8	0
Thiobacillus	0.0119049	0	0.0245299	0.0833195	0.0119049	0.00365588	0.020154	8	0
Oceanimonas	0.0119049	0	0.0245299	0.0828566	0.0119049	0.00365588	0.020154	8	0
Sanguibacter	0.0119049	0	0.0245299	0.0814983	0.0119049	0.00365588	0.020154	8	0
Klebsiella	0.144347	0.199319	0.0249218	0.0823504	-0.0549721	-0.103577	-0.00636692	97	99
Sulfurimonas	0.0148812	0.00201333	0.0302579	0.0994423	0.0128678	0.00283653	0.0228992	10	1
Litorilinea	0	0.00805331	0.0326234	0.102242	-0.00805331	-0.0159451	-0.000161529	0	4
Fontibacillus	0	0.00805331	0.0326234	0.103307	-0.00805331	-0.0159451	-0.000161529	0	4
WPS-1_genera_incertae_sedis	0	0.00805331	0.0326234	0.104395	-0.00805331	-0.0159451	-0.000161529	0	4
Acidisoma	0	0.00805331	0.0326234	0.104947	-0.00805331	-0.0159451	-0.000161529	0	4
Gluconobacter	0	0.00805331	0.0326234	0.105505	-0.00805331	-0.0159451	-0.000161529	0	4
Shewanella	0	0.00805331	0.0326234	0.103848	-0.00805331	-0.0159451	-0.000161529	0	4
Azoarcus	0	0.00805331	0.0326234	0.10664	-0.00805331	-0.0159451	-0.000161529	0	4
Peptococcus	0	0.00805331	0.0326234	0.102772	-0.00805331	-0.0159451	-0.000161529	0	4
Terrimonas	0	0.00805331	0.0326234	0.10607	-0.00805331	-0.0159451	-0.000161529	0	4
Rhizobium	0.0193455	0.00402666	0.0330003	0.102893	0.0153189	0.00341469	0.027223	13	2
Pedobacter	0.0089287	0	0.0420298	0.127771	0.0089287	0.0017847	0.0160727	6	0
Microbacterium	0.0089287	0	0.0420298	0.127135	0.0089287	0.0017847	0.0160727	6	0
Methylomicrobium	0.0089287	0	0.0420298	0.126506	0.0089287	0.0017847	0.0160727	6	0
Tolumonas	0.0089287	0	0.0420298	0.129716	0.0089287	0.0017847	0.0160727	6	0
Asticcacaulis	0.0089287	0	0.0420298	0.124654	0.0089287	0.0017847	0.0160727	6	0
BRC1_genera_incertae_sedis	0.0089287	0	0.0420298	0.125882	0.0089287	0.0017847	0.0160727	6	0
Methylomonas	0.0089287	0	0.0420298	0.129061	0.0089287	0.0017847	0.0160727	6	0
Smithella	0.0089287	0	0.0420298	0.130378	0.0089287	0.0017847	0.0160727	6	0
Mucilaginibacter	0.0089287	0	0.0420298	0.128413	0.0089287	0.0017847	0.0160727	6	0
Dyadobacter	0.0089287	0	0.0420298	0.125265	0.0089287	0.0017847	0.0160727	6	0
Paenibacillus	0.00297623	0.0140933	0.0426348	0.125835	-0.0111171	-0.0223419	0.000107781	2	7
